# Supplementary material for: The Effect of miR-520b on Macrophage Polarization and T Cell Immunity by Targeting PTEN in Breast Cancer
Source: Hindawi journal article supplement (doi:10.1155/2021/5170496), 2021-10-06

tumor model : All Events

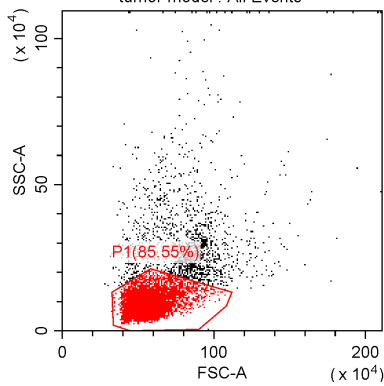

tumor+ inhibitor NC : All Events

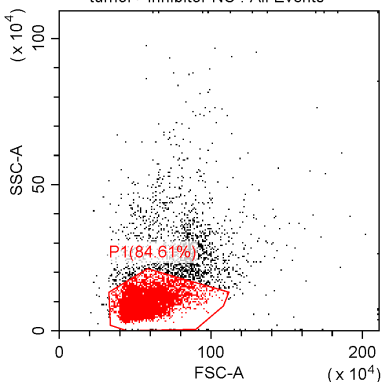

tumor miR inhibitor : All Events

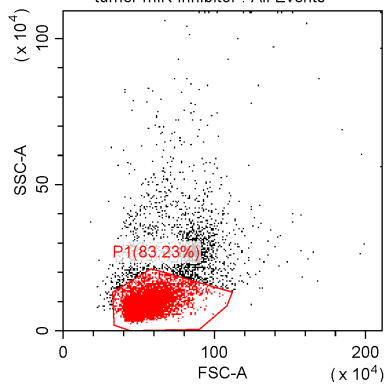

tumor model : P1

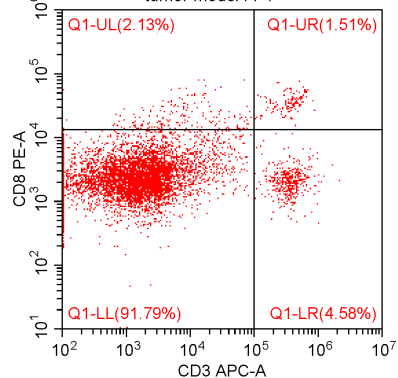

tumor+ inhibitor NC : P1

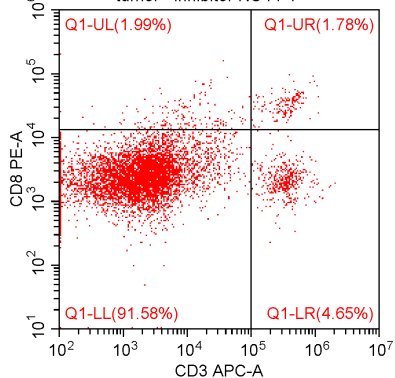

tumor miR inhibitor : P1

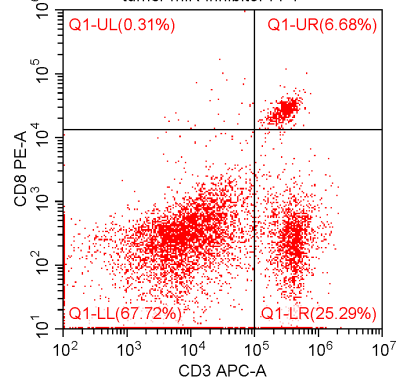

tumor+miR inhibitor+si... : All Events

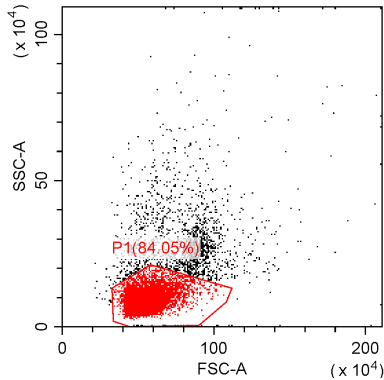

tumor+miR inhibitor+si... : All Events

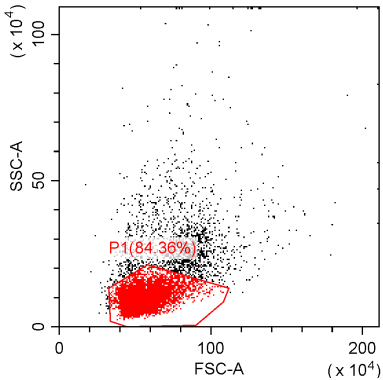

tumor+miR inhibitor+siNC : P1

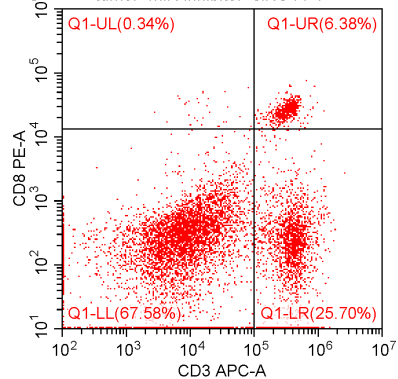

tumor+miR inhibitor+siPTEN : P1

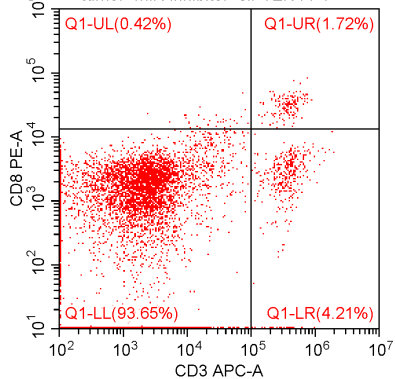

Supplement: f1 [file 5170496.f1.zip]
