# Supplementary material for: The Effect of miR-520b on Macrophage Polarization and T Cell Immunity by Targeting PTEN in Breast Cancer
Source: Hindawi journal article supplement (doi:10.1155/2021/5170496), 2021-10-06

control : All Events

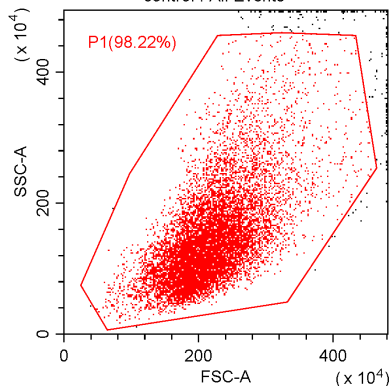

mimics NC : All Events

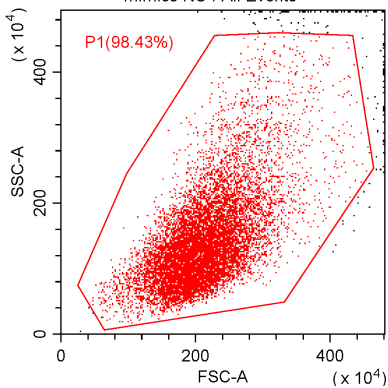

miR mimics : All Events

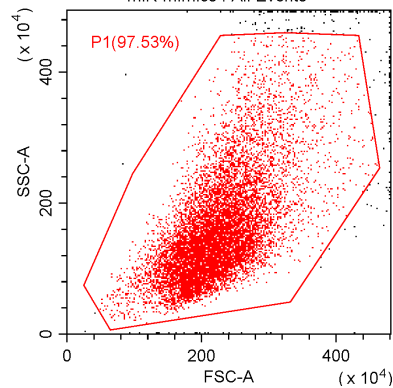

control : P1

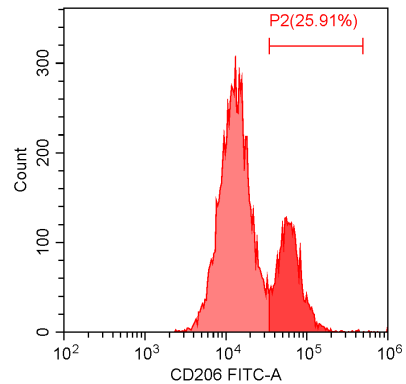

mimics NC : P1

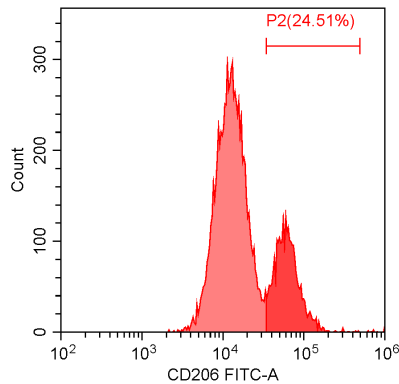

miR mimics : P1

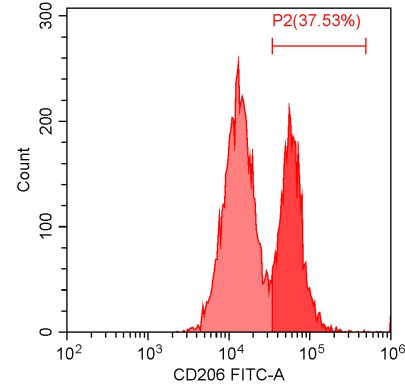

inhibitor NC : All Events

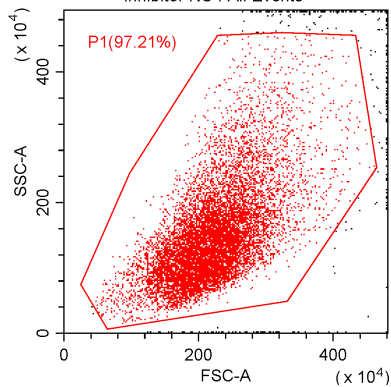

miR inhibitor : All Events

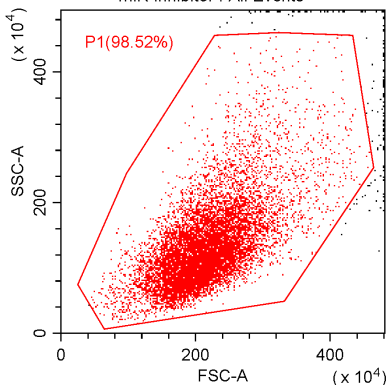

inhibitor NC : P1

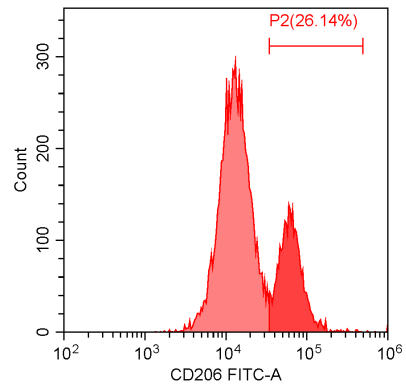

miR inhibitor : P1

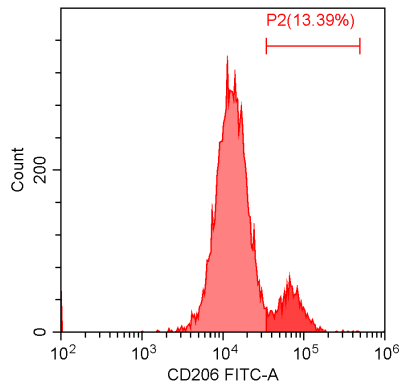

Supplement: f1 [file 5170496.f1.zip]
