# Supplementary figures and images for: The Effect of miR-520b on Macrophage Polarization and T Cell Immunity by Targeting PTEN in Breast Cancer
Source: Hindawi journal article supplement (doi:10.1155/2021/5170496), 2021-10-06

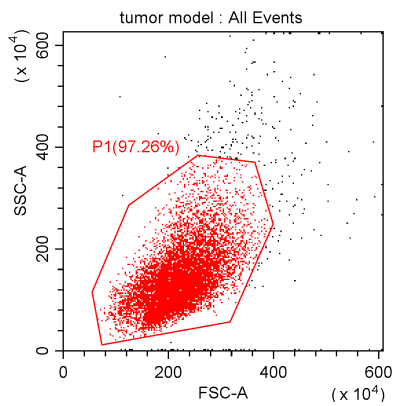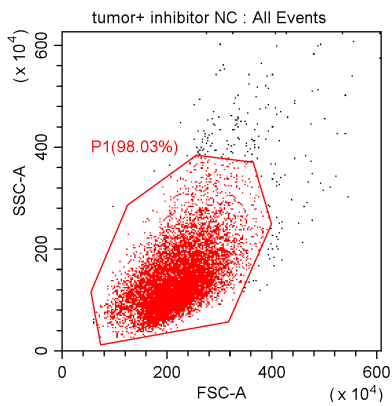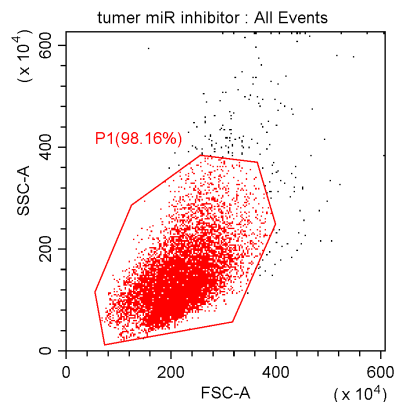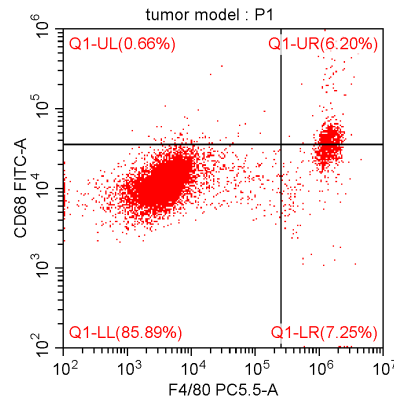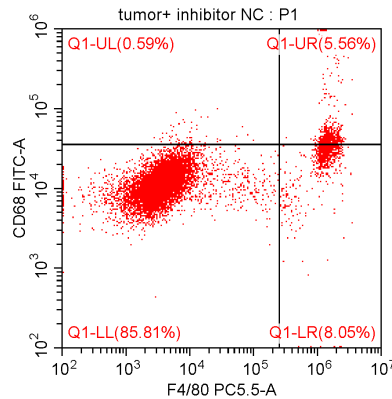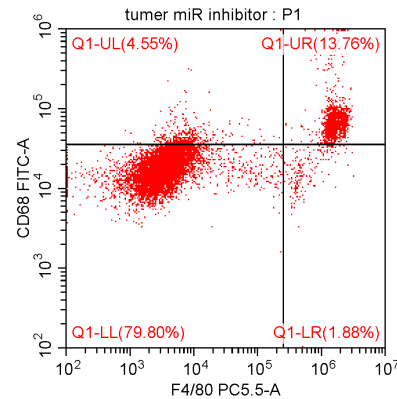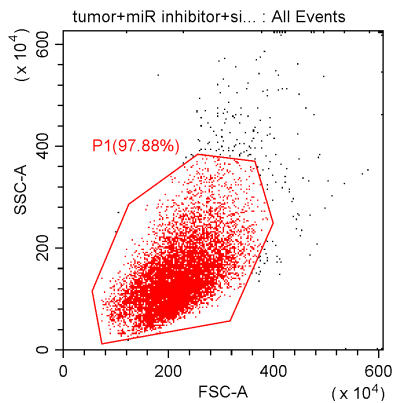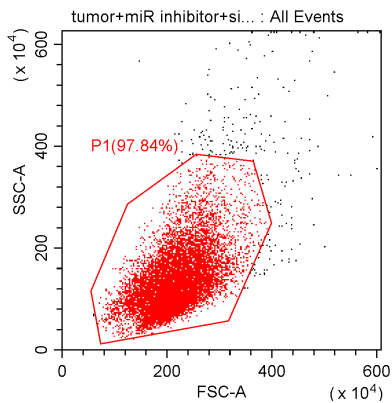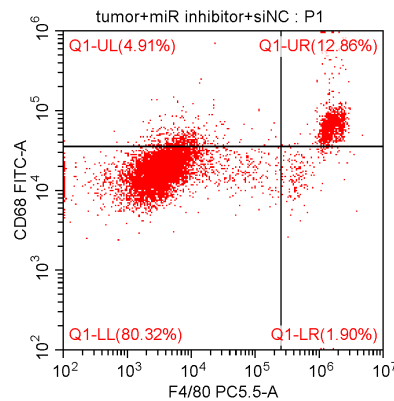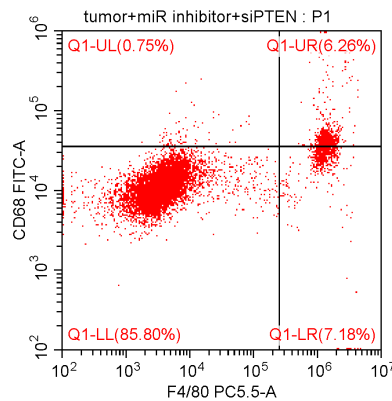

Supplement: f1 [file 5170496.f1.zip]

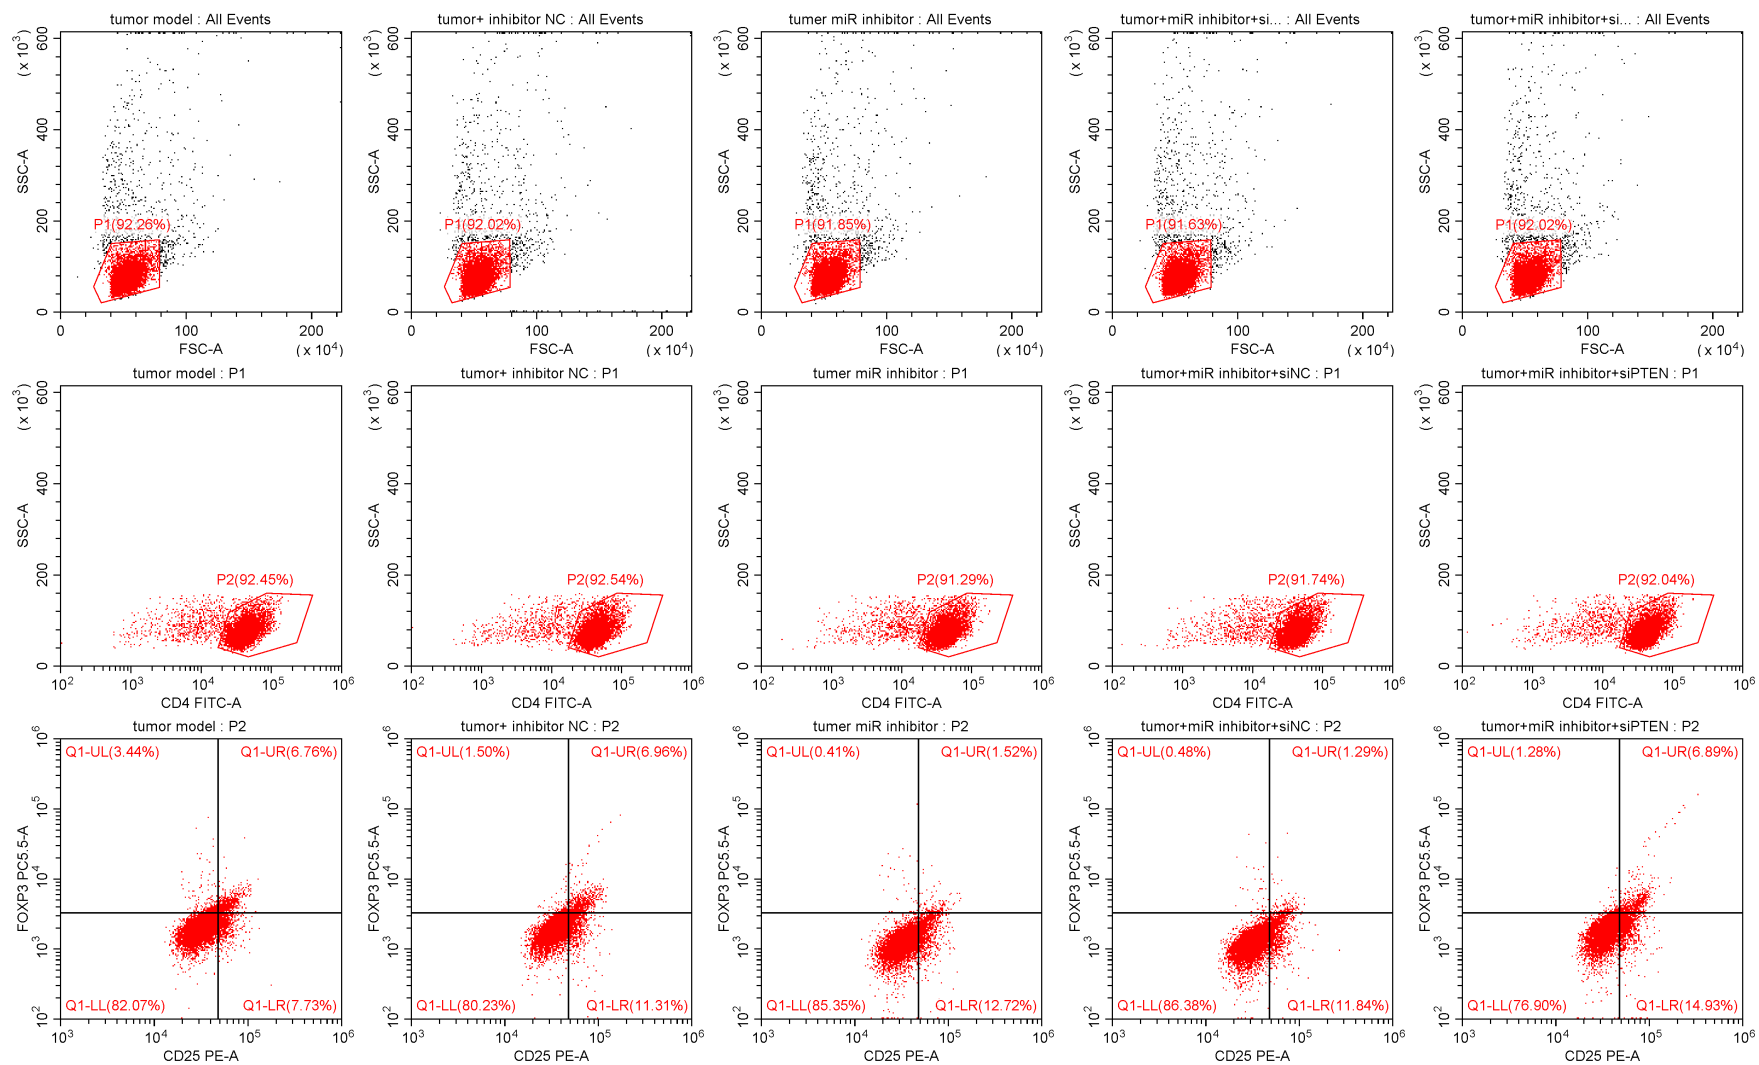

Supplement: f1 [file 5170496.f1.zip]

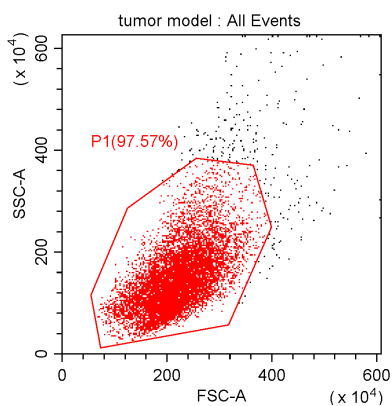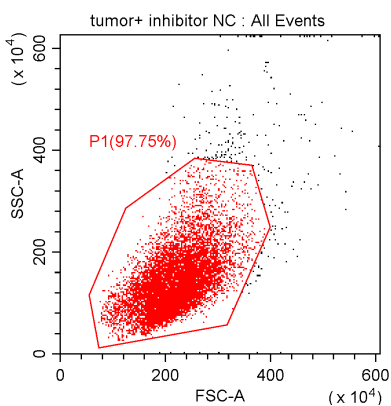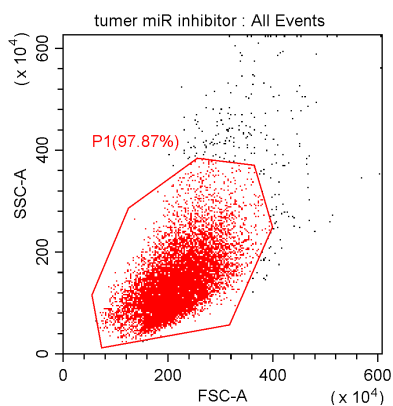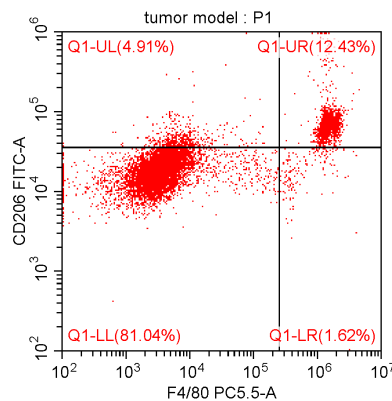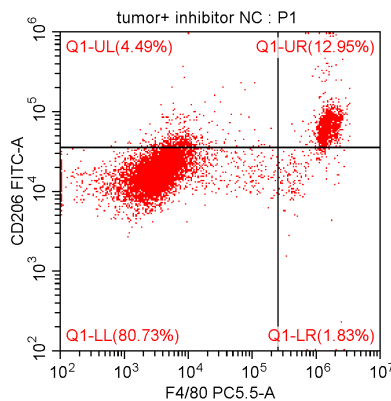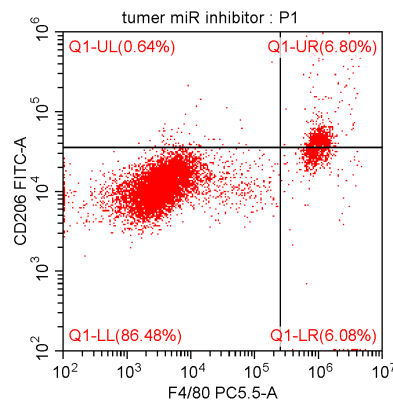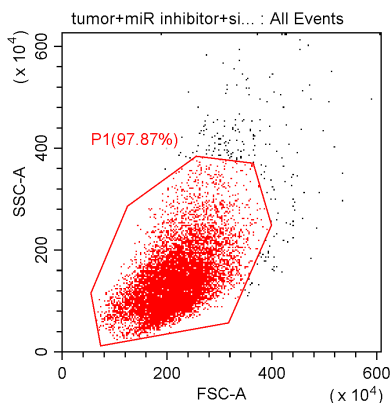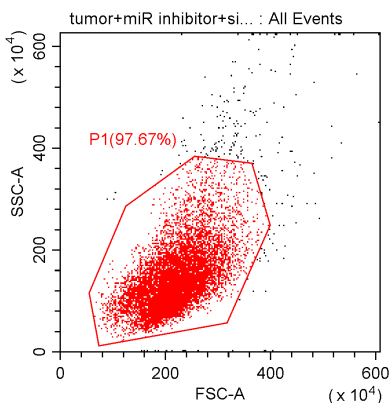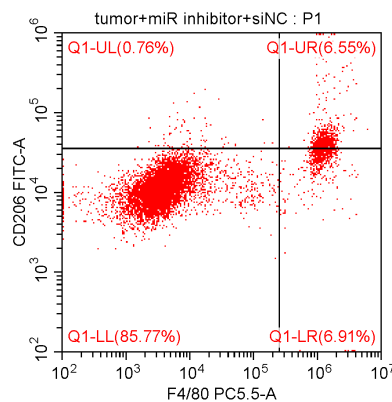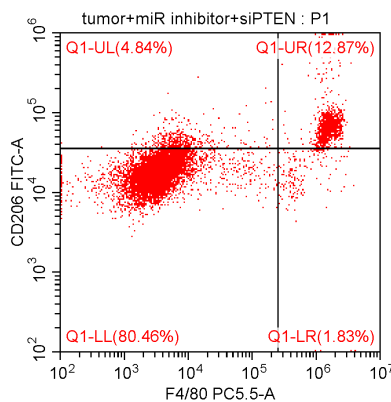

Supplement: f1 [file 5170496.f1.zip]

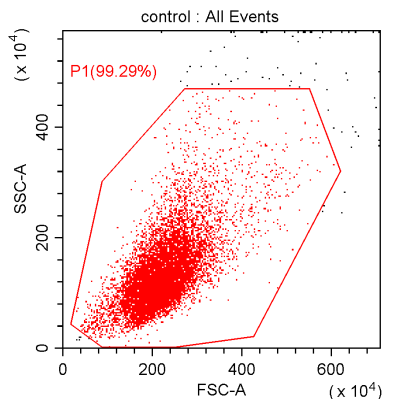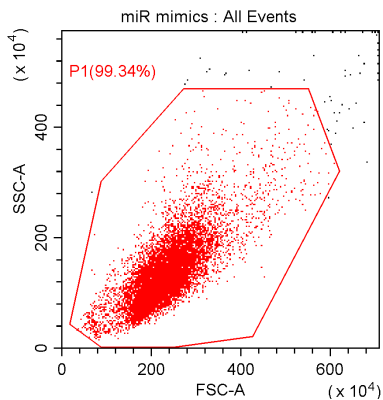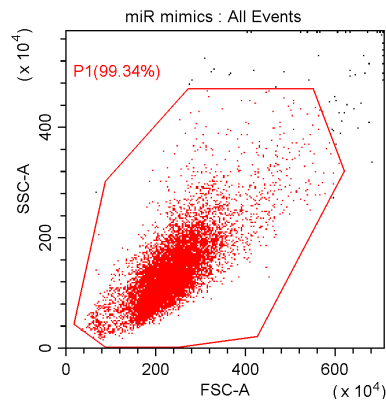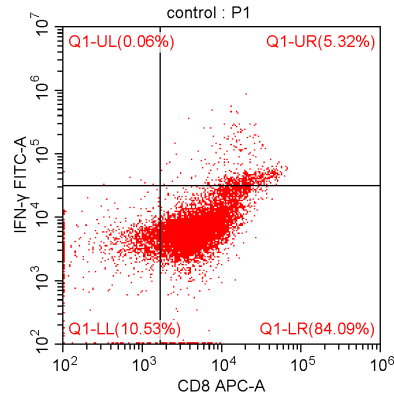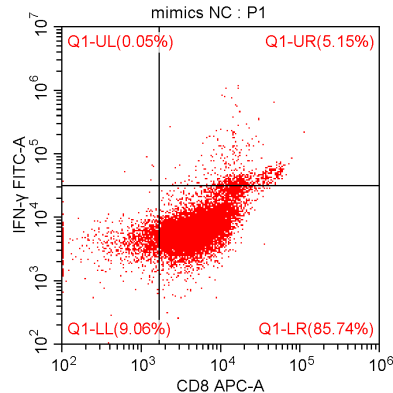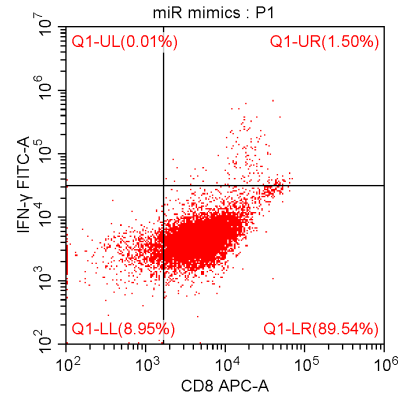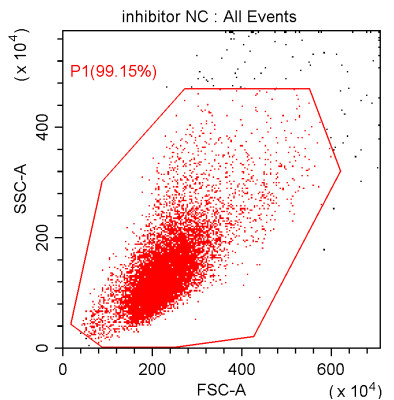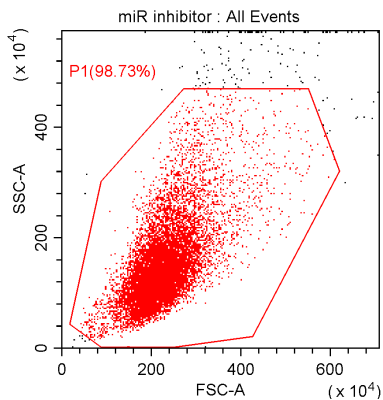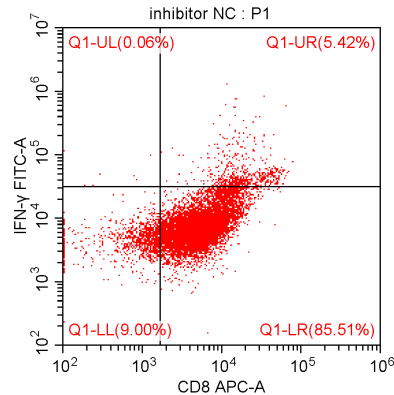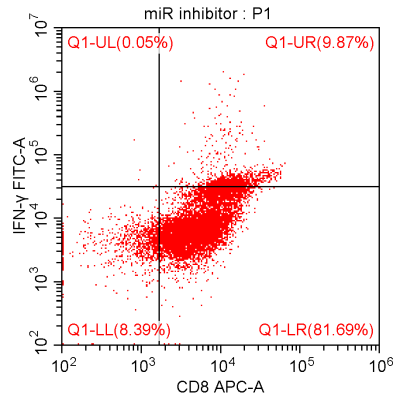

Supplement: f1 [file 5170496.f1.zip]

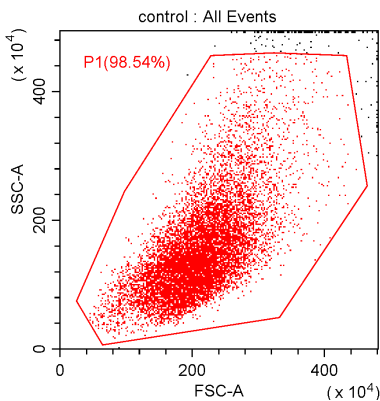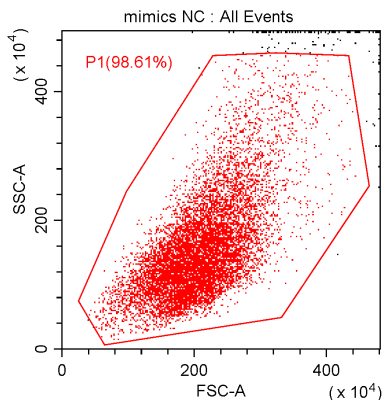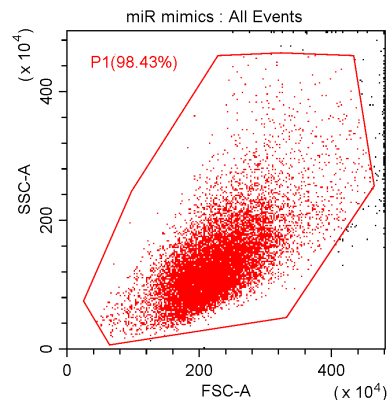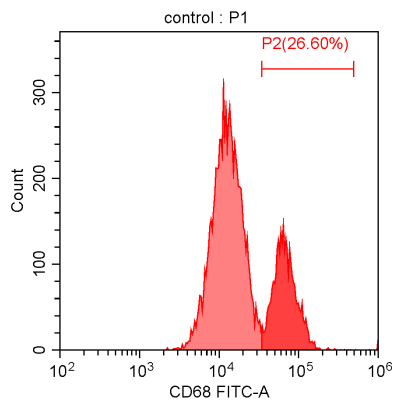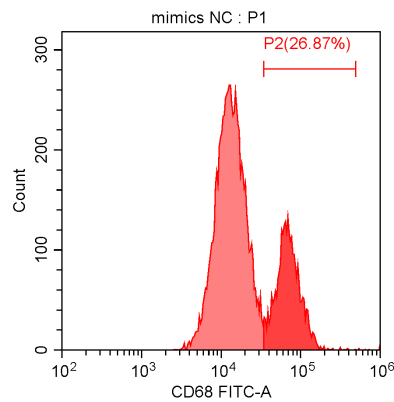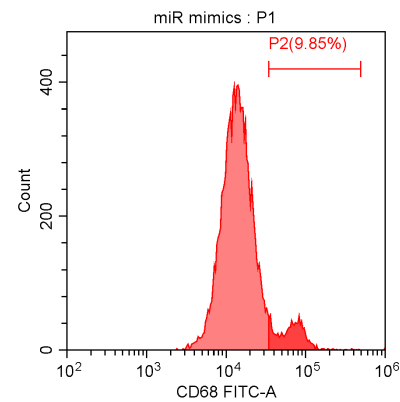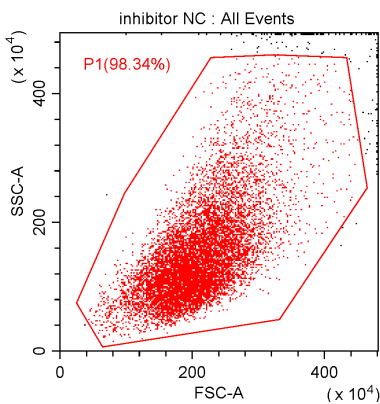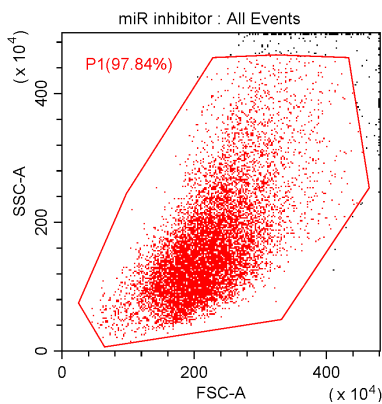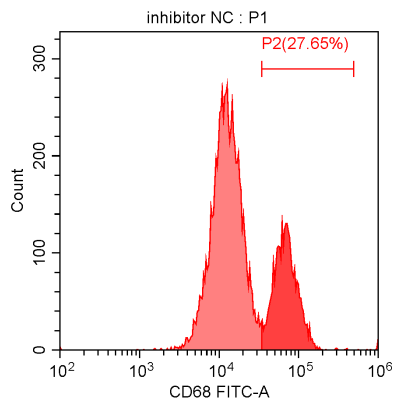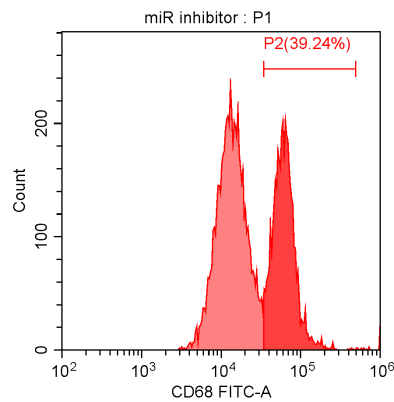

Supplement: f1 [file 5170496.f1.zip]

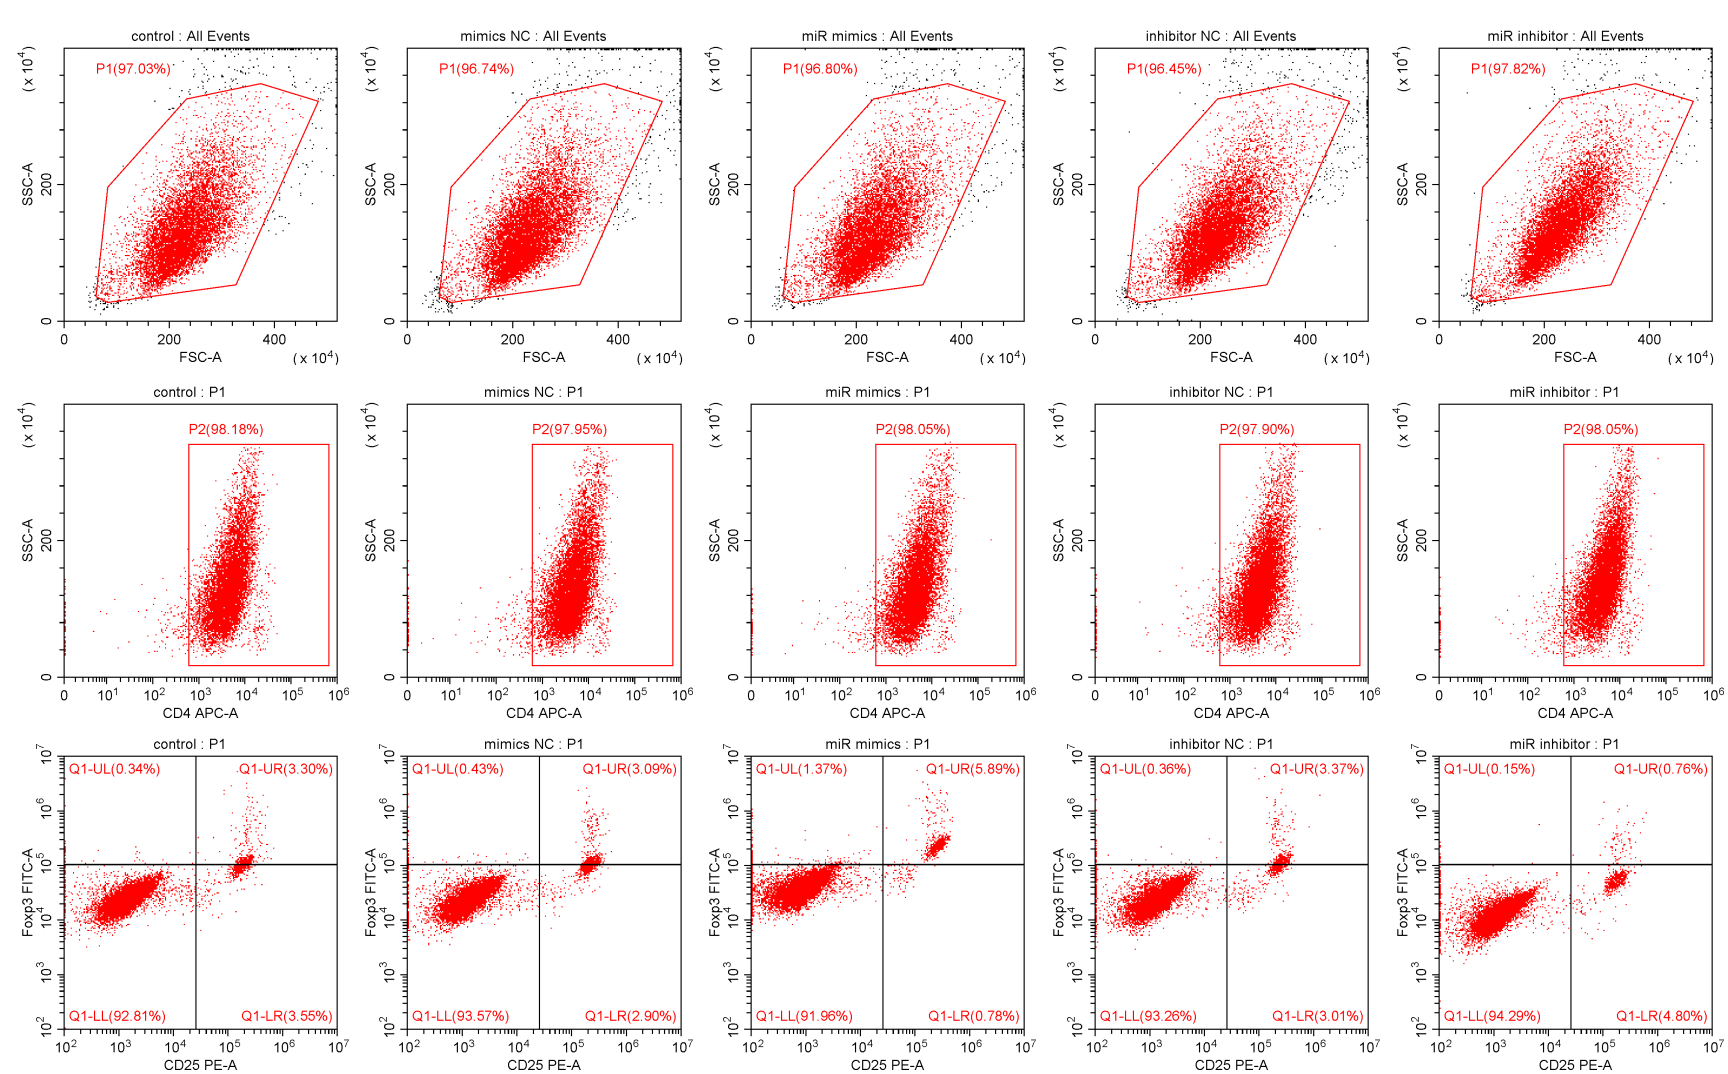

Supplement: f1 [file 5170496.f1.zip]

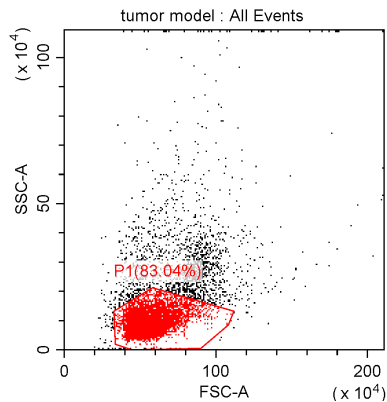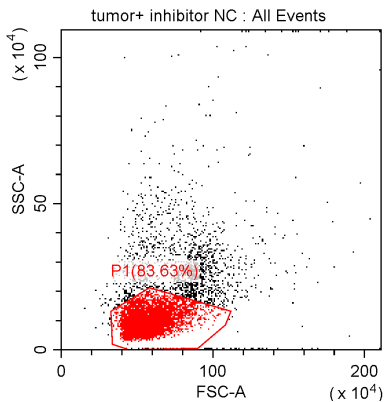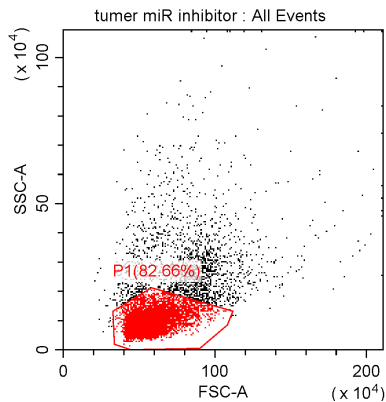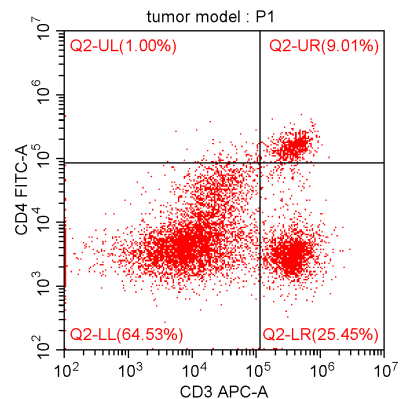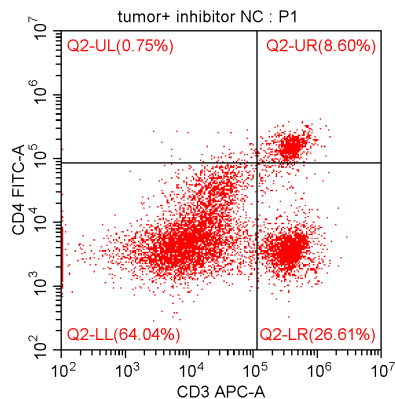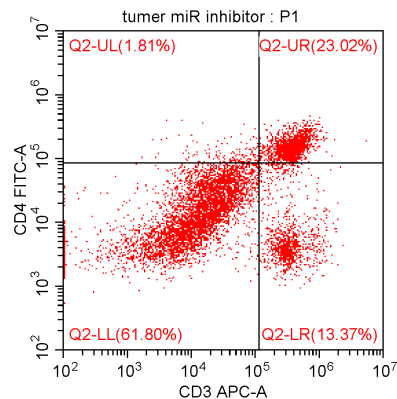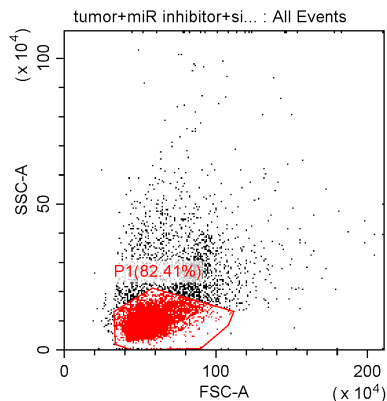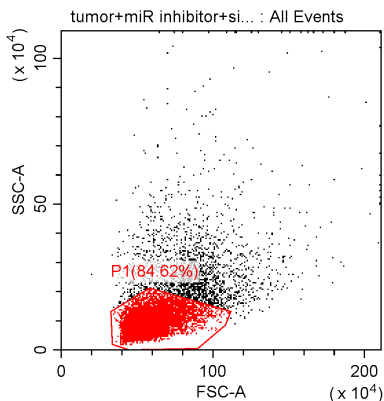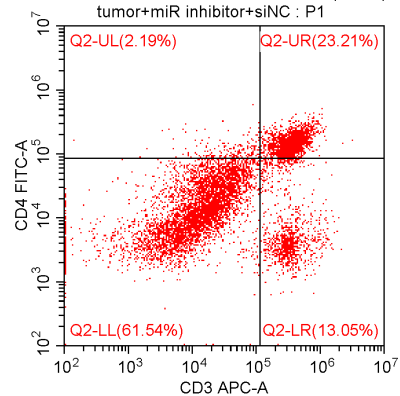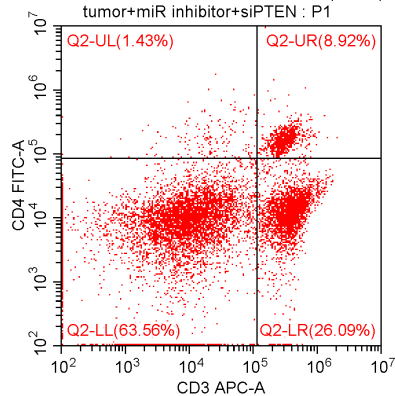

Supplement: f1 [file 5170496.f1.zip]

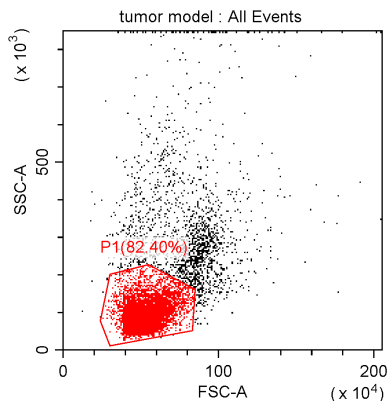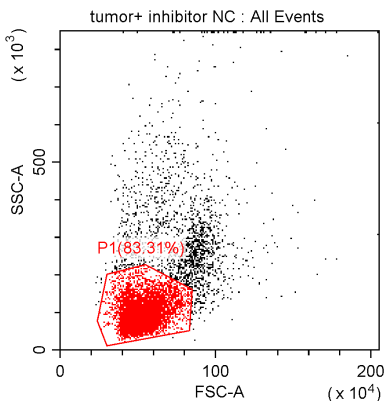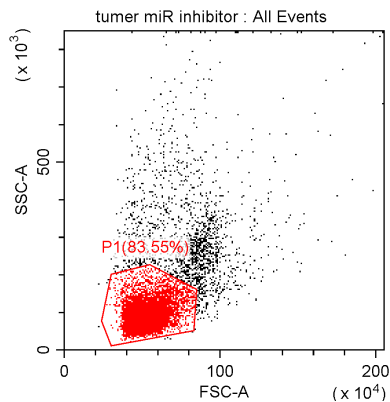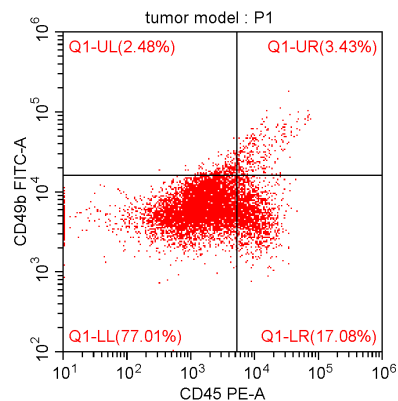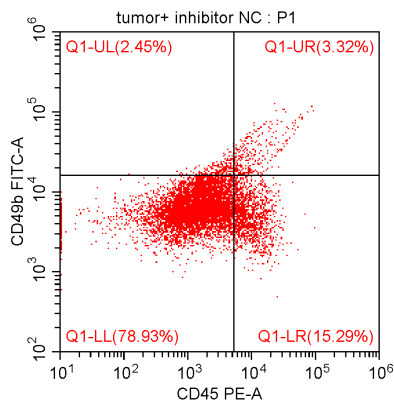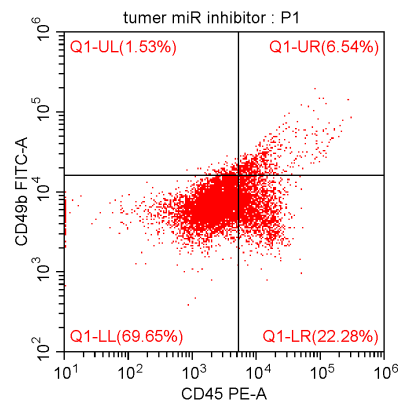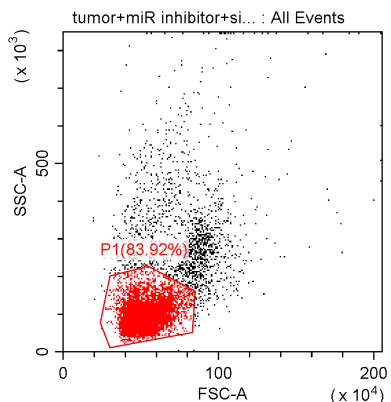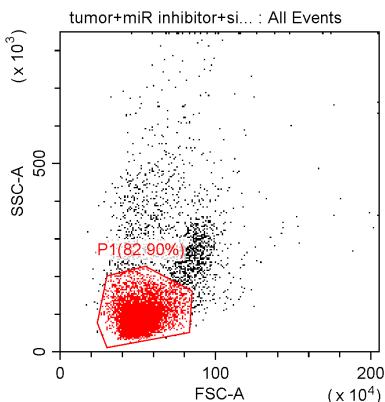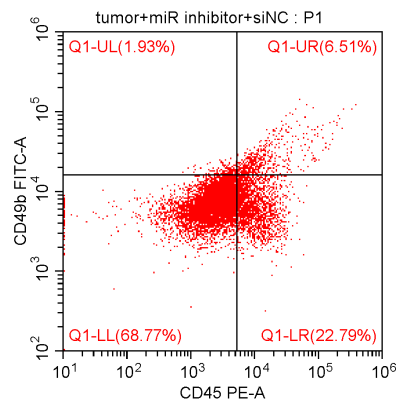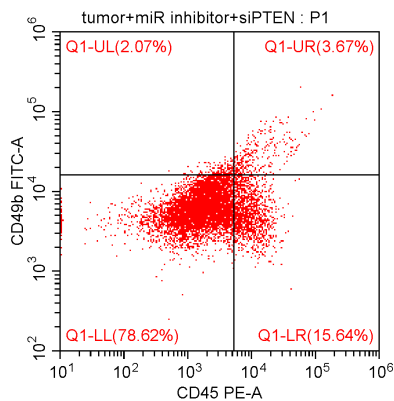

Supplement: f1 [file 5170496.f1.zip]
